# Supplementary material for: Diagnostic Value of Neutrophil-Lymphocyte Ratio for Predicting the Severity of Acute Pancreatitis: A Meta-Analysis
Source: Hindawi journal article supplement (doi:10.1155/2020/9731854), 2020-04-27

# Univariable Meta-regression & Subgroup Analyses

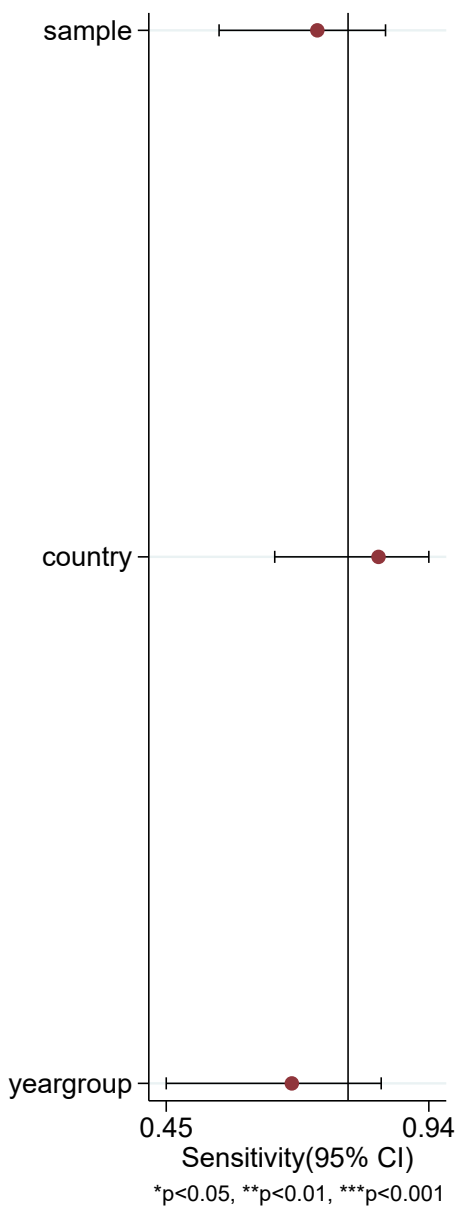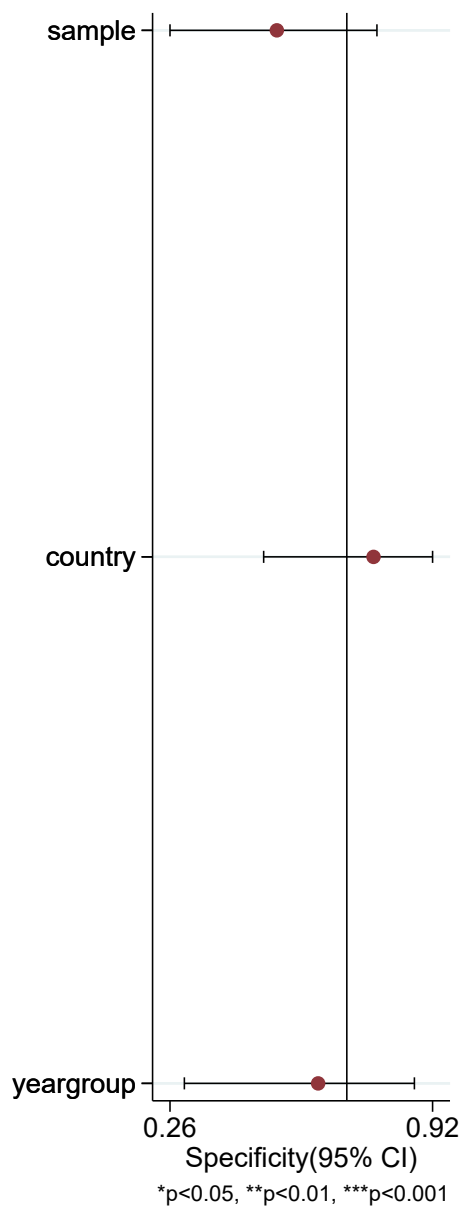

Supplement: f2 [file 9731854.f2.pdf]
