# Supplementary material for: Diagnostic Value of Neutrophil-Lymphocyte Ratio for Predicting the Severity of Acute Pancreatitis: A Meta-Analysis
Source: Hindawi journal article supplement (doi:10.1155/2020/9731854), 2020-04-27

(a) Goodness-Of-Fit

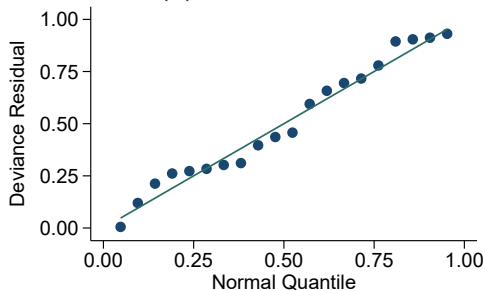

(b) Bivariate Normality

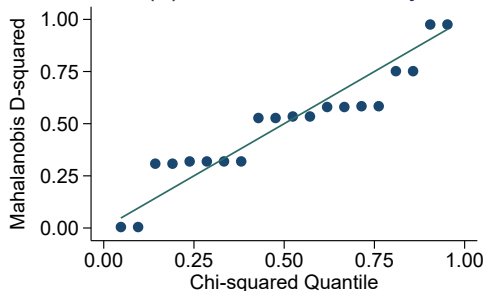

(c) Influence Analysis

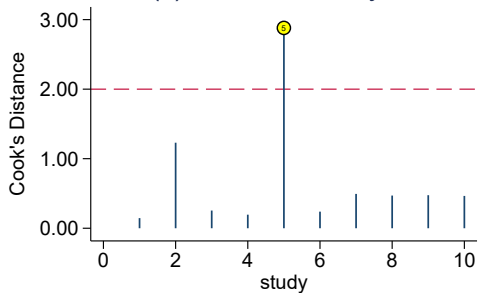

(d) Outlier Detection

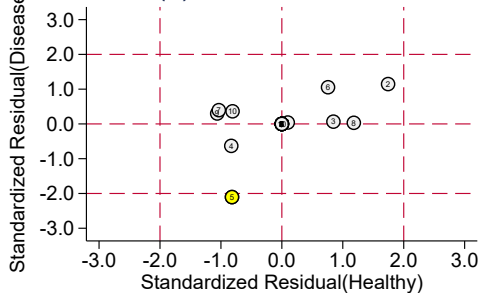

Supplement: f3 [file 9731854.f3.pdf]
